# Supplementary material for: Clinical Features of Cholangitis After Pancreaticoduodenectomy
Source: Research Square preprint supplement (doi:10.21203/rs.3.rs-1440610/v1), 2022-03-15
Supplement: Supplementary file 1 [file 31c479ce820c0797a31c0a67.xlsx]

## Sheet: Sheet1 
		Table 5 Details of the treatment of PPDC patients
		Medication
			Duration of medication (day)
		All patients	7 (3-31)a
		Severity of PPDC Mild	7 (3-26)a
		Moderate	7 (5-31)a
		Medication for PPDC	Number of events
		Oral antibiotic treatment	6
		Intravenous antibiotic treatment	27
		Intravenous therapy followed by oral antibiotics	3
		Antibacterial agents
		First antibacterial agent administered	Number of events
		Sulbactam / ampicillin	21
		Ceftriaxone	5
		Levofloxacin (oral antibiotics)	6
		Others	4
		Cases with subsequent change of antibiotics	11
		Treatment for stenosis of hepaticojejunostomy	Patients (n = 4)
		Patient No. Number of events of PPDC Treatment (severity of PPDC)
		1. 3 BD+SI (mild), SI (mild), BD+EL,
		SI (moderate), BD
		2. 2 BD+SI+EL (moderate), SI+EL (mild)
		3. 5 SI (moderate)
		4. 3 EO
		a Data was presented as median (range)
		BD Endoscopic baloon dilation; SI Endoscopic stent insertion;
		EL Endoscopic lithotripsy; EO Endoscopic observation only
